# Supplementary material for: Integrated Proteomics Based on 2D Gel Electrophoresis and Mass Spectrometry with Validations: Identification of a Biomarker Compendium for Oral Submucous Fibrosis—An Indian Study
Source: MDPI journal article supplement (doi:10.3390/jpm12020208), 2022-02-03
Supplement: s1 [file s1]

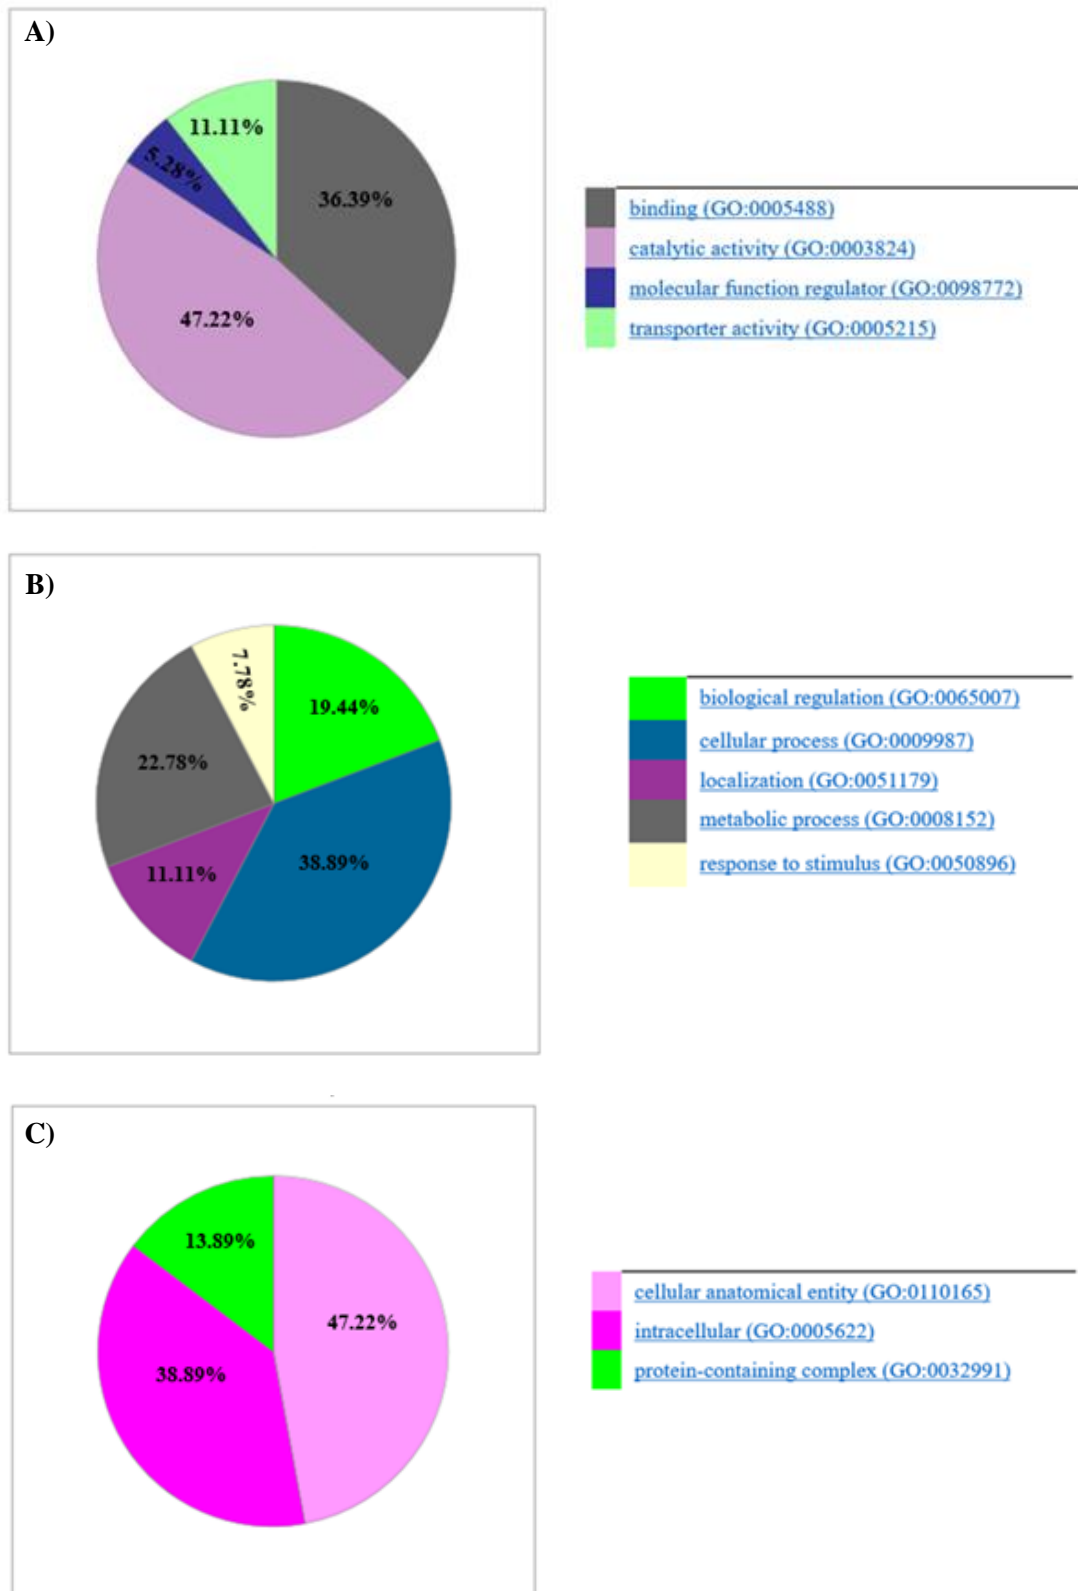

**Figure S1.** Functional classification of 23 differentially regulated proteins and biological network analysis using PANTHER gene ontology database, were functionally categorized as based on: **A)** Molecular Function, **B)** Biological Process, **C)** Cellular Component

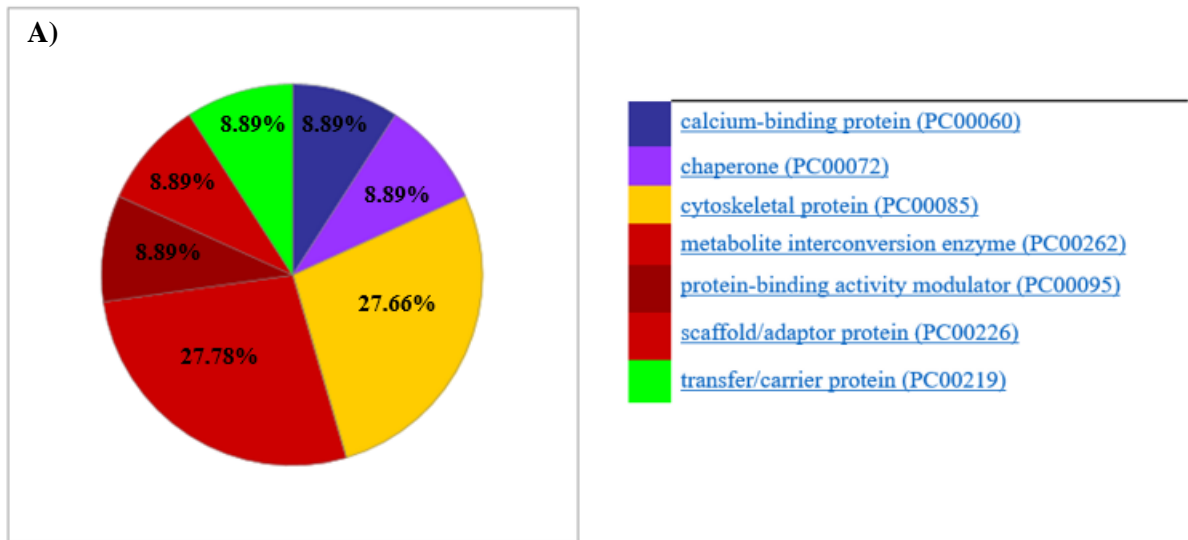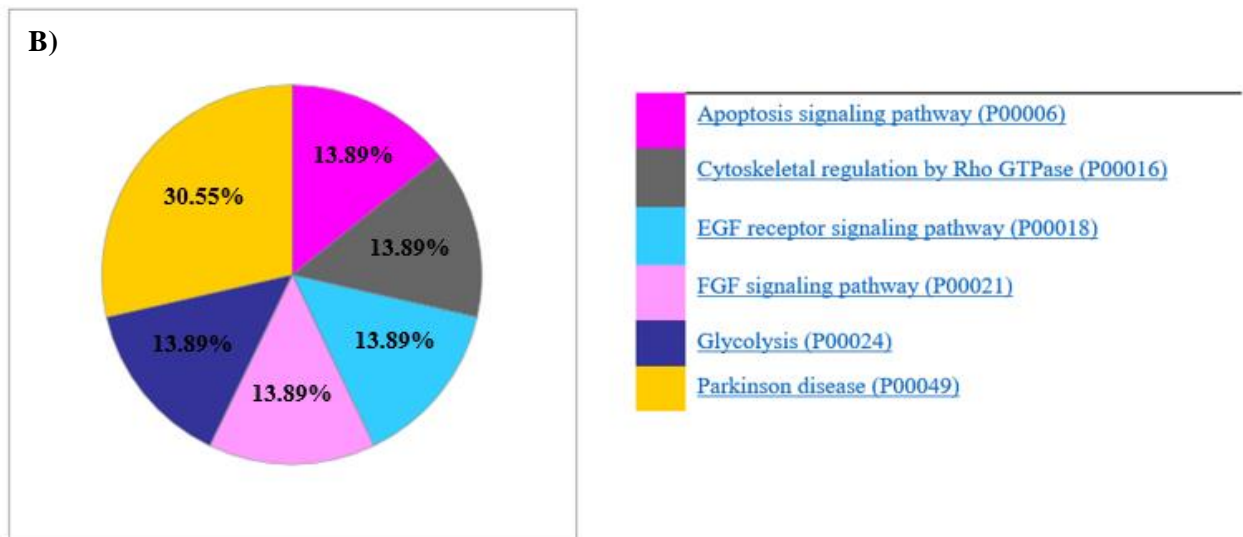

**Figure S2. A)** Protein classification and **B)** pathway analysis using PANTHER database for 23 differentially upregulated proteins

**Table S1.** Pathway analysis data of carbonic anhydrase 1 (CA 1)

| Qualifier   | Name                                      | GO Term            | %  | Count |
|-------------|-------------------------------------------|--------------------|----|-------|
| Part of     | cytosol                                   | Cellular Component | 20 | 5     |
| Enables     | carbonate dehydratase activity            | Molecular Function | 16 | 4     |
| Part of     | cytoplasm                                 | Cellular Component | 12 | 3     |
| Involved In | bicarbonate transport                     | Biological Process | 12 | 3     |
| Enables     | protein binding                           | Molecular Function | 8  | 2     |
| Enables     | arylesterase activity                     | Molecular Function | 4  | 1     |
| Involved In | one-carbon metabolic process              | Biological Process | 4  | 1     |
| Enables     | zinc ion binding                          | Molecular Function | 4  | 1     |
| Enables     | lyase activity                            | Molecular Function | 4  | 1     |
| Enables     | hydro-lyase activity                      | Molecular Function | 4  | 1     |
| Involved In | interleukin-12-mediated signaling pathway | Biological Process | 4  | 1     |
| Enables     | metal ion binding                         | Molecular Function | 4  | 1     |
| Part of     | extracellular exosome                     | Cellular Component | 4  | 1     |

**Table S2.** Pathway analysis data of 14-3-3.

| Qualifier   | Name                                                | GO Term            | %     | Count |
|-------------|-----------------------------------------------------|--------------------|-------|-------|
| Enables     | protein binding                                     | Molecular Function | 41.49 | 78    |
| Part of     | cytosol                                             | Cellular Component | 19.15 | 36    |
| Part of     | cytoplasm                                           | Cellular Component | 2.13  | 4     |
| Part of     | extracellular exosome                               | Cellular Component | 2.13  | 4     |
| Part of     | nucleus                                             | Cellular Component | 1.60  | 3     |
| Enables     | ion channel binding                                 | Molecular Function | 1.60  | 3     |
| Enables     | enzyme binding                                      | Molecular Function | 1.06  | 2     |
| Enables     | protein domain specific binding                     | Molecular Function | 1.06  | 2     |
| Enables     | identical protein binding                           | Molecular Function | 1.06  | 2     |
| Enables     | histone deacetylase binding                         | Molecular Function | 1.06  | 2     |
| Involved In | G2/M transition of mitotic cell cycle               | Biological Process | 0.53  | 1     |
| Involved In | MAPK cascade                                        | Biological Process | 0.53  | 1     |
| Involved In | neuron migration                                    | Biological Process | 0.53  | 1     |
| Involved In | regulation of heart rate by hormone                 | Biological Process | 0.53  | 1     |
| Enables     | RNA binding                                         | Molecular Function | 0.53  | 1     |
| Enables     | calcium channel regulator activity                  | Molecular Function | 0.53  | 1     |
| Part of     | cell                                                | Cellular Component | 0.53  | 1     |
| Part of     | mitochondrion                                       | Cellular Component | 0.53  | 1     |
| Part of     | kinesin complex                                     | Cellular Component | 0.53  | 1     |
| Part of     | plasma membrane                                     | Cellular Component | 0.53  | 1     |
| Part of     | focal adhesion                                      | Cellular Component | 0.53  | 1     |
| Involved In | protein targeting                                   | Biological Process | 0.53  | 1     |
| Involved In | regulation of G2/M transition of mitotic cell cycle | Biological Process | 0.53  | 1     |
| Enables     | potassium channel regulator activity                | Molecular Function | 0.53  | 1     |
| Part of     | membrane                                            | Cellular Component | 0.53  | 1     |
| Involved In | viral process                                       | Biological Process | 0.53  | 1     |

|             |                                      |                    |      |   |
|-------------|--------------------------------------|--------------------|------|---|
| Involved In | substantia nigra development         | Biological Process | 0.53 | 1 |
| Involved In | hippocampus development              | Biological Process | 0.53 | 1 |
| Involved In | cerebral cortex development          | Biological Process | 0.53 | 1 |
| Enables     | MHC class II protein complex binding | Molecular Function | 0.53 | 1 |
| Part of     | axon                                 | Cellular Component | 0.53 | 1 |
| Enables     | ubiquitin protein ligase binding     | Molecular Function | 0.53 | 1 |

**Table S3.** Pathway analysis data of HSP 70

| Name                     | Qualifier   | GO Term            | %     | Count |
|--------------------------|-------------|--------------------|-------|-------|
| ATP binding              | Enables     | Molecular Function | 28.57 | 2     |
| nucleotide binding       | Enables     | Molecular Function | 14.29 | 1     |
| protein folding          | Involved In | Biological Process | 14.29 | 1     |
| ATPase                   | Enables     | Molecular Function | 14.29 | 1     |
| melanosome               | Part of     | Cellular Component | 14.29 | 1     |
| unfolded protein binding | Enables     | Molecular Function | 14.29 | 1     |
